# Supplementary material for: Association between breastfeeding duration and educational achievement in England: results from the Millennium Cohort Study
Source: HighWire-hosted journal article supplement (doi:10.1136/archdischild-2022-325148), 2023-06-05
Supplement: archdischild-2022-325148supp001_data_supplement.pdf [file archdischild-2022-325148supp001_data_supplement.pdf]

**Supplementary material 1.** Characteristics (baseline) of participants included at each stage of the study, excluding twins\*<sup>†</sup>.

| Characteristics                    | Stage 1    |        | Stage 2   |        | Stage 3   |        | Stage 4      |        |
|------------------------------------|------------|--------|-----------|--------|-----------|--------|--------------|--------|
|                                    | England    |        | Linked    |        | Eligible  |        | Final sample |        |
|                                    | (n=11,372) |        | (n=7,429) |        | (n=5,290) |        | (n=4,940)    |        |
|                                    | n          | (%)    | n         | (%)    | n         | (%)    | n            | (%)    |
| <b>Pregnancy and child-related</b> |            |        |           |        |           |        |              |        |
| Gestational age at birth**         | 39.4       | (2.0)  | 39.4      | (1.9)  | 39.8      | (1.3)  | 39.8         | (1.3)  |
| Female                             | 5,549      | (48.9) | 3,690     | (49.1) | 2,686     | (49.5) | 2,517        | (49.9) |
| Age at Key Stage 4**               | 16.2       | (0.3)  | 16.2      | (0.3)  | 16.2      | (0.3)  | 16.2         | (0.3)  |
| No older siblings                  | 5,747      | (51.4) | 3,709     | (51.2) | 2,641     | (50.8) | 2,492        | (51.2) |
| Smoked during pregnancy            |            |        |           |        |           |        |              |        |
| <i>Never</i>                       | 4,660      | (65.9) | 5,129     | (65.1) | 3,745     | (63.8) | 3,515        | (64.4) |
| <i>Gave up</i>                     | 1,384      | (13.3) | 899       | (13.3) | 635       | (13.2) | 601          | (13.4) |
| <i>Kept smoking</i>                | 2,313      | (20.8) | 1,397     | (21.6) | 910       | (23.0) | 824          | (22.2) |
| Mod/heavy alcohol in preg.         | 775        | (7.5)  | 522       | (7.4)  | 391       | (7.7)  | 370          | (7.7)  |
| <b>Sociodemographic</b>            |            |        |           |        |           |        |              |        |
| Maternal age (years)**             | 30.1       | (6.0)  | 29.8      | (5.9)  | 29.7      | (6.1)  | 29.8         | (6.0)  |
| Maternal education                 |            |        |           |        |           |        |              |        |
| <i>Higher</i>                      | 2,678      | (27.0) | 1,926     | (24.8) | 1,584     | (23.6) | 1,551        | (25.0) |
| <i>Medium</i>                      | 929        | (8.8)  | 652       | (8.5)  | 486       | (8.1)  | 471          | (8.5)  |
| <i>Lower</i>                       | 5,022      | (46.3) | 3,366     | (47.6) | 2,371     | (48.7) | 2,238        | (49.2) |
| <i>Other</i>                       | 424        | (2.5)  | 230       | (2.5)  | 137       | (2.3)  | 112          | (2.0)  |
| <i>None</i>                        | 2,279      | (15.4) | 1,243     | (16.6) | 706       | (17.3) | 568          | (15.3) |
| Highest parental social class      |            |        |           |        |           |        |              |        |
| <i>Managerial/Professional</i>     | 4,392      | (44.9) | 3,208     | (43.4) | 2,549     | (42.1) | 2,477        | (44.2) |
| <i>Intermediate</i>                | 3,200      | (28.1) | 2,101     | (28.4) | 1,445     | (27.9) | 1,348        | (28.2) |
| <i>Semi-routine/routine</i>        | 2,951      | (22.0) | 1,720     | (23.0) | 1,056     | (24.3) | 921          | (22.6) |
| <i>Not applicable</i>              | 829        | (5.0)  | 400       | (5.2)  | 240       | (5.7)  | 194          | (4.9)  |
| Mother working at age 9 m.         | 4,758      | (47.0) | 3,470     | (47.1) | 2,669     | (47.9) | 2,571        | (49.4) |
| Maternal relationship status       |            |        |           |        |           |        |              |        |
| <i>Married</i>                     | 6,779      | (60.1) | 4,639     | (58.7) | 3,415     | (56.5) | 3,220        | (57.9) |
| <i>Cohabitation</i>                | 2,751      | (25.9) | 1,821     | (26.9) | 1,277     | (27.8) | 1,196        | (27.9) |
| <i>Single mother</i>               | 1,817      | (13.9) | 960       | (14.4) | 598       | (15.7) | 524          | (14.2) |
| Maternal ethnicity: White          | 8,543      | (86.4) | 5,859     | (86.1) | 4,363     | (88.1) | 4,174        | (89.6) |
| Language spoken at home            |            |        |           |        |           |        |              |        |
| <i>English only</i>                | 8,984      | (90.9) | 6,075     | (90.9) | 4,525     | (90.7) | 4,305        | (92.0) |
| <i>English + other language</i>    | 1,770      | (9.1)  | 1,001     | (9.1)  | 765       | (9.3)  | 635          | (8.0)  |

**Supplementary material 1 (cont.).** Characteristics (baseline) of participants included at each stage of the study, excluding twins\*<sup>†</sup>.

| Characteristics                        | Stage 1    |        | Stage 2   |        | Stage 3   |        | Stage 4      |        |
|----------------------------------------|------------|--------|-----------|--------|-----------|--------|--------------|--------|
|                                        | England    |        | Linked    |        | Eligible  |        | Final sample |        |
|                                        | (n=11,372) |        | (n=7,429) |        | (n=5,290) |        | (n=4,940)    |        |
|                                        | n          | (%)    | n         | (%)    | n         | (%)    | n            | (%)    |
| <b>Sociodemographic (cont.)</b>        |            |        |           |        |           |        |              |        |
| Index of Multiple Deprivation          |            |        |           |        |           |        |              |        |
| <i>Poorest quintile</i>                | 4,041      | (23.3) | 2,325     | (24.4) | 1,430     | (24.4) | 1,248        | (22.8) |
| <i>Second quintile</i>                 | 2,469      | (19.3) | 1,617     | (19.8) | 1,168     | (20.6) | 1,089        | (20.3) |
| <i>Middle quintile</i>                 | 1,947      | (20.5) | 1,369     | (20.9) | 1,035     | (21.3) | 989          | (21.8) |
| <i>Fourth quintile</i>                 | 1,533      | (18.9) | 1,080     | (17.8) | 849       | (17.7) | 823          | (18.4) |
| <i>Richest quintile</i>                | 1,381      | (18.0) | 1,038     | (17.2) | 808       | (16.0) | 791          | (16.8) |
| <b>Maternal cognitive score**</b>      | -          | -      | -         | -      | -         | -      | 0.0          | (0.99) |
| <b>Schooling outcomes</b>              |            |        |           |        |           |        |              |        |
| <b>Key Stage 3 (age 16)</b>            |            |        |           |        |           |        |              |        |
| <b>English GCSE</b>                    |            |        |           |        |           |        |              |        |
| <i>&lt;Expected (Level &lt;2)</i>      | -          | -      | 2,416     | (34.3) | 1,575     | (33.4) | 1,394        | (31.3) |
| <i>Expected (Level ≥2 &amp; &lt;3)</i> | -          | -      | 3,813     | (50.4) | 2,769     | (51.0) | 2,632        | (52.5) |
| <i>&gt;Expected (Level ≥3)</i>         | -          | -      | 1,195     | (15.3) | 944       | (15.5) | 914          | (16.2) |
| <b>Math GCSE</b>                       |            |        |           |        |           |        |              |        |
| <i>&lt;Expected (Level &lt;2)</i>      | -          | -      | 2,354     | (33.3) | 1,517     | (32.3) | 1,329        | (29.9) |
| <i>Expected (Level ≥2 &amp; &lt;3)</i> | -          | -      | 3,638     | (48.5) | 2,658     | (49.5) | 2,529        | (51.0) |
| <i>&gt;Expected (Level ≥3)</i>         | -          | -      | 1,432     | (18.2) | 1,113     | (18.2) | 1,082        | (19.1) |
| <b>General outcomes</b>                |            |        |           |        |           |        |              |        |
| <b>Five GCSEs</b>                      | -          | -      | 4,186     | (54.6) | 3,152     | (55.1) | 3,030        | (57.4) |
| <b>Attainment 8</b>                    | -          | -      | 45.4      | (19.7) | 45.7      | (20.0) | 47.1         | (18.9) |

\* Numbers do not exactly match those of the flowchart, as all these descriptive statistics have been produced excluding twins.

<sup>†</sup> All percentages consider the complex survey sampling of MCS and percentages from Stages 2-4 additionally consider longitudinal attrition.

\*\* Mean (standard deviation)

**Stage 1 - England:** Initial MCS participants from England, considering baseline weights.

**Stage 2 - Linkage:** MCS participants from England with productive educational data linkage. Weights consider longitudinal attrition at age 7 (when educational data linkage was carried out).

**Stage 3 - Eligible:** Participants that, additionally, meet the eligibility criteria (excluding pre-term births, no data on gestational age, birth weight exclusions, not speaking English, and not being present at the follow-up visit at age 14). Weights consider longitudinal attrition at age 14.

**Stage 4 - Final sample:** Final sample of participants included in the analysis, after excluding those that were examined in a different academic year, had missing data for the educational outcomes, had an Attainment 8 score of zero, or had missing data for the confounders, including maternal cognitive ability. Weights consider longitudinal attrition at age 14.

**Supplementary material 2.** Univariate association between participants' characteristics and KS4 results at age 16 in English (n=5,026) and Mathematics (n=5,012)\*, Millennium Cohort Study.

| Characteristics                    | English |        |          |        |                  |        | p      | Math   |        |          |        |                  |        | p <sup>†</sup> |
|------------------------------------|---------|--------|----------|--------|------------------|--------|--------|--------|--------|----------|--------|------------------|--------|----------------|
|                                    | Failed  |        | Low pass |        | High pass (A-A*) |        |        | Failed |        | Low pass |        | High pass (A-A*) |        |                |
|                                    | n       | (%)    | n        | (%)    | n                | (%)    |        | n      | (%)    | n        | (%)    | n                | (%)    |                |
| <b>Pregnancy and child-related</b> |         |        |          |        |                  |        |        |        |        |          |        |                  |        |                |
| Gestational age at birth**         | 39.7    | (1.2)  | 39.8     | (1.3)  | 39.9             | (1.3)  | 0.062  | 39.7   | (1.2)  | 39.8     | (1.3)  | 39.9             | (1.4)  | 0.069          |
| Sex                                |         |        |          |        |                  |        |        |        |        |          |        |                  |        |                |
| <i>Female</i>                      | 558     | (24.9) | 1,399    | (54.5) | 586              | (20.6) | <0.001 | 679    | (30.2) | 1,326    | (51.4) | 534              | (18.4) | 0.259          |
| <i>Male</i>                        | 914     | (40.1) | 1,240    | (48.6) | 329              | (11.3) |        | 722    | (32.1) | 1,203    | (48.8) | 548              | (19.1) |                |
| Age at Key Stage 4**               | 16.2    | (0.3)  | 16.2     | (0.3)  | 16.2             | (0.3)  | 0.207  | 16.2   | (0.3)  | 16.2     | (0.3)  | 16.2             | (0.3)  | 0.513          |
| Older siblings                     |         |        |          |        |                  |        |        |        |        |          |        |                  |        |                |
| <i>No</i>                          | 724     | (32.2) | 1,328    | (51.5) | 481              | (16.3) | 0.715  | 668    | (29.9) | 1,286    | (50.7) | 569              | (19.4) | 0.198          |
| <i>Yes</i>                         | 748     | (33.0) | 1,311    | (51.5) | 434              | (15.5) |        | 733    | (32.5) | 1,243    | (49.4) | 513              | (18.1) |                |
| Smoked during pregnancy            |         |        |          |        |                  |        |        |        |        |          |        |                  |        |                |
| <i>Never</i>                       | 909     | (27.3) | 1,913    | (53.6) | 738              | (19.1) | <0.001 | 872    | (26.5) | 1,790    | (50.6) | 88               | (22.9) | <0.001         |
| <i>Gave up</i>                     | 170     | (29.9) | 334      | (55.1) | 103              | (15.0) |        | 166    | (29.3) | 331      | (53.5) | 110              | (17.2) |                |
| <i>Kept smoking</i>                | 393     | (49.0) | 392      | (43.6) | 74               | (7.4)  |        | 363    | (45.3) | 408      | (46.5) | 84               | (8.2)  |                |
| Mod/heavy alcohol in preg.         |         |        |          |        |                  |        |        |        |        |          |        |                  |        |                |
| <i>No</i>                          | 1,337   | (32.0) | 2,448    | (51.8) | 850              | (16.2) | 0.043  | 1,288  | (30.9) | 2,333    | (50.0) | 1,014            | (19.1) | 0.126          |
| <i>Yes</i>                         | 129     | (39.0) | 184      | (47.6) | 64               | (13.4) |        | 113    | (33.9) | 196      | (51.4) | 68               | (14.7) |                |
| <b>Sociodemographic, age 9 m.</b>  |         |        |          |        |                  |        |        |        |        |          |        |                  |        |                |
| Maternal age (years)**             | 28.5    | (5.9)  | 30.0     | (5.9)  | 31.6             | (5.7)  | <0.001 | 28.7   | (6.0)  | 29.9     | (5.9)  | 31.5             | (5.5)  | <0.001         |
| Maternal education                 |         |        |          |        |                  |        |        |        |        |          |        |                  |        |                |
| <i>Higher (NVQ 4 and 5)</i>        | 341     | (22.3) | 773      | (49.5) | 448              | (28.2) | <0.001 | 315    | (20.2) | 704      | (45.5) | 539              | (34.3) | <0.001         |
| <i>Medium (NVQ 3)</i>              | 106     | (22.0) | 261      | (55.3) | 109              | (22.7) |        | 92     | (20.1) | 266      | (55.3) | 117              | (24.6) |                |
| <i>Lower (NVQ 1 and 2)</i>         | 711     | (33.7) | 1,288    | (55.2) | 274              | (11.1) |        | 682    | (32.2) | 1,245    | (54.0) | 340              | (13.8) |                |
| <i>Other/None<sup>§</sup></i>      | 314     | (48.7) | 317      | (42.2) | 84               | (9.1)  | <0.001 | 312    | (48.5) | 314      | (43.2) | 86               | (8.3)  | <0.001         |
| Highest parental social class      |         |        |          |        |                  |        |        |        |        |          |        |                  |        |                |
| <i>Managerial/Professional</i>     | 555     | (22.7) | 1,330    | (54.3) | 612              | (23.0) | <0.001 | 504    | (20.5) | 1,242    | (50.6) | 745              | (28.9) | <0.001         |
| <i>Intermediate</i>                | 424     | (33.6) | 758      | (53.3) | 192              | (13.1) |        | 398    | (31.4) | 761      | (55.3) | 211              | (13.3) |                |
| <i>Semi-routine/routine</i>        | 397     | (45.8) | 470      | (46.7) | 85               | (7.5)  |        | 409    | (46.2) | 437      | (45.1) | 103              | (8.7)  |                |
| <i>Not applicable</i>              | 96      | (51.9) | 81       | (39.1) | 26               | (9.0)  |        | 90     | (52.4) | 89       | (39.4) | 23               | (8.2)  |                |
| Mother working                     |         |        |          |        |                  |        |        |        |        |          |        |                  |        |                |
| <i>No</i>                          | 854     | (39.5) | 1,168    | (46.7) | 400              | (13.8) | <0.001 | 808    | (37.6) | 1,153    | (46.8) | 455              | (15.6) | <0.001         |
| <i>Yes</i>                         | 618     | (25.4) | 1,471    | (56.5) | 515              | (18.1) |        | 593    | (24.4) | 1,376    | (53.5) | 627              | (22.1) |                |

**Supplementary material 2 (cont.).** Univariate association between participants' characteristics and KS4 results at age 16 in English (n=5,026) and Mathematics (n=5,012) GCSEs\*, Millennium Cohort Study.

| Characteristics                   | English |        |          |        |                  |        | p      | Math   |        |          |        |                  |        | p <sup>¶</sup> |
|-----------------------------------|---------|--------|----------|--------|------------------|--------|--------|--------|--------|----------|--------|------------------|--------|----------------|
|                                   | Failed  |        | Low pass |        | High pass (A-A*) |        |        | Failed |        | Low pass |        | High pass (A-A*) |        |                |
|                                   | n       | (%)    | n        | (%)    | n                | (%)    |        | n      | (%)    | n        | (%)    | n                | (%)    |                |
| <b>Sociodemographic (cont.)</b>   |         |        |          |        |                  |        |        |        |        |          |        |                  |        |                |
| Maternal relationship status      |         |        |          |        |                  |        |        |        |        |          |        |                  |        |                |
| <i>Married</i>                    | 834     | (27.1) | 1,730    | (52.9) | 696              | (20.0) | <0.001 | 796    | (25.4) | 1,636    | (50.8) | 824              | (23.8) | <0.001         |
| <i>Cohabitation</i>               | 398     | (36.7) | 654      | (51.2) | 169              | (12.1) |        | 370    | (35.0) | 642      | (51.1) | 201              | (13.9) |                |
| <i>Single mother</i>              | 240     | (46.1) | 255      | (46.7) | 50               | (7.2)  |        | 235    | (46.4) | 251      | (45.1) | 57               | (8.5)  |                |
| Maternal ethnicity                |         |        |          |        |                  |        |        |        |        |          |        |                  |        |                |
| <i>White</i>                      | 1,259   | (33.3) | 2,215    | (51.0) | 773              | (15.7) | 0.047  | 1,169  | (30.3) | 2,148    | (49.9) | 917              | (18.9) | 0.734          |
| <i>Other ethnicity</i>            | 213     | (26.5) | 424      | (55.5) | 142              | (18.0) |        | 232    | (31.3) | 381      | (51.7) | 165              | (17.9) |                |
| Language spoken at home           |         |        |          |        |                  |        |        |        |        |          |        |                  |        |                |
| <i>English only</i>               | 1,302   | (33.3) | 2,294    | (51.2) | 784              | (15.5) | 0.001  | 1,218  | (31.5) | 2,233    | (50.1) | 915              | (18.4) | 0.011          |
| <i>English + other language</i>   | 170     | (24.4) | 345      | (55.4) | 131              | (20.2) |        | 183    | (27.0) | 296      | (49.3) | 167              | (23.7) |                |
| Index of Multiple Deprivation     |         |        |          |        |                  |        |        |        |        |          |        |                  |        |                |
| <i>Poorest quintile</i>           | 491     | (44.6) | 624      | (46.0) | 168              | (9.4)  | <0.001 | 474    | (43.4) | 617      | (45.0) | 190              | (11.6) | <0.001         |
| <i>Second quintile</i>            | 355     | (35.6) | 579      | (50.7) | 182              | (13.7) |        | 331    | (34.1) | 574      | (50.8) | 206              | (15.1) |                |
| <i>Middle quintile</i>            | 259     | (30.8) | 556      | (53.3) | 182              | (15.9) |        | 265    | (30.4) | 529      | (53.1) | 203              | (16.5) |                |
| <i>Fourth quintile</i>            | 199     | (25.1) | 455      | (55.2) | 179              | (19.7) |        | 180    | (23.2) | 419      | (52.0) | 228              | (24.8) |                |
| <i>Richest quintile</i>           | 168     | (22.9) | 425      | (53.7) | 204              | (23.4) |        | 151    | (20.3) | 390      | (20.1) | 255              | (29.6) |                |
| <b>Maternal cognitive score**</b> | -0.26   | (0.91) | 0.02     | (0.96) | 0.47             | (1.11) | <0.001 | -0.29  | (0.91) | 0.00     | (0.95) | 0.48             | (1.08) | <0.001         |

\*Parameters were estimated considering the complex design of the MCS sample. The counts reflect the absolute number of participants included.

\*\*Mean (S.D.)

¶Chi-square or mean difference, as appropriate.

§No education and Other/overseas educational qualifications were displayed together as a safeguarding procedure, as some counts were <10.

**Supplementary material 3.** Univariate association between participants' characteristics and KS4 results at age 16: Passing five GCSEs with marks  $\geq 5$ , including English and Mathematics (n=5,012) and Attainment 8 score (n=4,940)\*, Millennium Cohort Study.

| Characteristics                    | Five GCSEs $\geq 5$ marks |        |       |        | p      | Attainment 8 |        | p <sup>¶</sup> |
|------------------------------------|---------------------------|--------|-------|--------|--------|--------------|--------|----------------|
|                                    | No                        |        | Yes   |        |        | Mean         | S.D.   |                |
|                                    | n                         | (%)    | n     | (%)    |        |              |        |                |
| <b>Pregnancy and child-related</b> |                           |        |       |        |        |              |        |                |
| Gestational age at birth**         | 39.7                      | (1.2)  | 39.8  | (1.3)  | 0.019  | 0.03         |        | 0.017          |
| Sex                                |                           |        |       |        |        |              |        |                |
| <i>Female</i>                      | 865                       | (38.2) | 1,674 | (61.8) | <0.001 | 49.4         | (18.7) | <0.001         |
| <i>Male</i>                        | 1,117                     | (48.9) | 1,356 | (51.1) |        | 44.9         | (18.7) |                |
| Age at Key Stage 4**               | 16.2                      | (0.3)  | 16.2  | (0.3)  | 0.120  | 0.02         |        | 0.117          |
| Older siblings                     |                           |        |       |        |        |              |        |                |
| <i>No</i>                          | 970                       | (42.9) | 1,553 | (57.1) | 0.347  | 47.5         | (18.7) | 0.197          |
| <i>Yes</i>                         | 1,012                     | (44.4) | 1,477 | (55.6) |        | 46.7         | (19.0) |                |
| Smoked during pregnancy            |                           |        |       |        |        |              |        |                |
| <i>Never</i>                       | 1,230                     | (36.9) | 2,320 | (63.1) | <0.001 | 50.1         | (19.6) | <0.001         |
| <i>Gave up</i>                     | 245                       | (43.5) | 362   | (56.5) |        | 46.5         | (17.3) |                |
| <i>Kept smoking</i>                | 507                       | (62.7) | 348   | (37.3) |        | 38.8         | (15.0) |                |
| Mod/heavy alcohol in preg.         |                           |        |       |        |        |              |        |                |
| <i>No</i>                          | 1,818                     | (43.2) | 2,817 | (56.8) | 0.088  | 47.3         | (18.8) | 0.009          |
| <i>Yes</i>                         | 164                       | (48.4) | 213   | (51.6) |        | 44.4         | (19.5) |                |
| <b>Sociodemographic, age 9 m.</b>  |                           |        |       |        |        |              |        |                |
| Maternal age (years)**             | 28.6                      | (5.9)  | 30.7  | (5.8)  | <0.001 | 0.18         |        | <0.001         |
| Maternal education                 |                           |        |       |        |        |              |        |                |
| <i>Higher (NVQ 4 and 5)</i>        | 438                       | (28.4) | 1,120 | (71.6) | <0.001 | 55.4         | (21.4) | <0.001         |
| <i>Medium (NVQ 3)</i>              | 151                       | (32.3) | 324   | (67.7) |        | 51.8         | (19.7) |                |
| <i>Lower (NVQ 1 and 2)</i>         | 990                       | (46.4) | 1,277 | (53.6) |        | 44.8         | (16.3) |                |
| <i>Other/None</i> <sup>§</sup>     | 403                       | (62.2) | 309   | (37.8) |        | 39.3         | (16.5) |                |
| Highest parental social class      |                           |        |       |        |        |              |        |                |
| <i>Managerial/Professional</i>     | 737                       | (30.5) | 1,754 | (69.5) | <0.001 | 53.1         | (19.7) | <0.001         |
| <i>Intermediate</i>                | 586                       | (45.8) | 784   | (54.2) |        | 45.2         | (16.9) |                |
| <i>Semi-routine/routine</i>        | 535                       | (60.4) | 414   | (39.6) |        | 40.0         | (15.5) |                |
| <i>Not applicable</i>              | 124                       | (67.7) | 78    | (32.3) |        | 37.4         | (18.1) |                |
| Mother working                     |                           |        |       |        |        |              |        |                |
| <i>No</i>                          | 1,116                     | (51.4) | 1,300 | (48.6) | <0.001 | 44.2         | (18.9) | <0.001         |
| <i>Yes</i>                         | 866                       | (35.6) | 1,730 | (64.4) |        | 50.1         | (18.3) |                |

**Supplementary material 3 (cont.).** Univariate association between participants' characteristics and KS4 results at age 16: Passing five GCSEs with marks  $\geq 5$ , including English and Mathematics (n=5,012) and Attainment 8 score (n=4,940)\*, Millennium Cohort Study.

| Characteristics                   | Five GCSEs $\geq 5$ marks |        |       |        | p      | Attainment 8 |        | p      |
|-----------------------------------|---------------------------|--------|-------|--------|--------|--------------|--------|--------|
|                                   | Yes                       |        | No    |        |        | Mean         | S.D.   |        |
|                                   | n                         | (%)    | n     | (%)    |        |              |        |        |
| <b>Sociodemographic (cont.)</b>   |                           |        |       |        |        |              |        |        |
| Maternal relationship status      |                           |        |       |        |        |              |        |        |
| <i>Married</i>                    | 1,128                     | (36.1) | 2,128 | (63.9) | <0.001 | 50.6         | (19.8) | <0.001 |
| <i>Cohabitation</i>               | 531                       | (49.2) | 682   | (50.8) |        | 43.9         | (16.9) |        |
| <i>Single mother</i>              | 323                       | (62.4) | 220   | (37.6) |        | 39.2         | (14.9) |        |
| Maternal ethnicity                |                           |        |       |        |        |              |        |        |
| <i>White</i>                      | 1,669                     | (44.1) | 2,565 | (55.9) | 0.145  | 46.9         | (18.4) | 0.030  |
| <i>Other ethnicity</i>            | 313                       | (39.7) | 465   | (60.3) |        | 48.8         | (22.0) |        |
| Language spoken at home           |                           |        |       |        |        |              |        |        |
| <i>English only</i>               | 1,737                     | (44.3) | 2,629 | (55.7) | 0.001  | 46.8         | (18.3) | <0.001 |
| <i>English + other language</i>   | 245                       | (35.4) | 401   | (64.6) |        | 50.8         | (23.7) |        |
| Index of Multiple Deprivation     |                           |        |       |        |        |              |        |        |
| <i>Poorest quintile</i>           | 658                       | (58.8) | 623   | (41.2) | <0.001 | 41.0         | (19.1) | <0.001 |
| <i>Second quintile</i>            | 478                       | (47.8) | 633   | (52.2) |        | 45.5         | (18.9) |        |
| <i>Middle quintile</i>            | 368                       | (42.3) | 629   | (57.7) |        | 47.0         | (17.4) |        |
| <i>Fourth quintile</i>            | 268                       | (34.9) | 559   | (65.1) |        | 51.4         | (17.4) |        |
| <i>Richest quintile</i>           | 210                       | (28.8) | 586   | (71.2) |        | 52.7         | (18.8) |        |
| <b>Maternal cognitive score**</b> | -0.28                     | (0.92) | 0.21  | (1.01) | <0.001 | 0.28         |        | <0.001 |

\*Parameters were estimated considering the complex design of the MCS sample. The counts reflect the absolute number of participants included.

\*\*Mean (S.D.). Correlation coefficient between continuous variables and Attainment 8 score.

<sup>†</sup>Chi-square, mean difference or correlation, as appropriate.

<sup>§</sup>No education and Other/overseas educational qualifications were displayed together as a safeguarding procedure, as some counts were <10.
